# Supplementary material for: Implementation of a Cellulitis Management Plan in Three Australian Regional Health Services to Address an Evidence–Practice Gap in Antibiotic Prescribing
Source: MDPI journal article supplement (doi:10.3390/antibiotics10111288), 2021-10-22
Supplement: s1 [file s1]

---

|    |                                                                                                                                                                                                                                                                                                                                                                    |
|----|--------------------------------------------------------------------------------------------------------------------------------------------------------------------------------------------------------------------------------------------------------------------------------------------------------------------------------------------------------------------|
| 1. | Please outline your understanding of the aims of the ‘cellulitis project’ (known as CELLIT) that introduced the cellulitis management plan and created the consumer leaflet.                                                                                                                                                                                       |
| 2. | How do the tools developed in this project compare to other tools available in your setting?<br>If required, ask directly: <ul style="list-style-type: none"> <li>a. What advantages did the cellulitis management plan offer compared to other tools?</li> <li>b. What disadvantages did the cellulitis management plan offer compared to other tools?</li> </ul> |
| 3. | Thinking back to when the cellulitis management plan was introduced, how prepared did you feel to use the cellulitis management plan as intended? Why?                                                                                                                                                                                                             |
| 4. | How has the cellulitis management plan influenced cellulitis management in your organisation?                                                                                                                                                                                                                                                                      |
| 5. | Describe whether you think the cellulitis management plan should be made available to other organisations to use. Why do you say that?                                                                                                                                                                                                                             |
| 5b | If you think the cellulitis management plan should be made available to other organisations to use, outline: <ul style="list-style-type: none"> <li>a. Whether further pilot testing would be required?</li> <li>b. What components should be kept the same?</li> <li>c. What components should be changed?</li> </ul>                                             |
| 6. | How confident are you that the cellulitis management plan will still be in use in 12 months’ time? Why do you say this?                                                                                                                                                                                                                                            |
| 7. | Would you like to add anything else to our discussion about the cellulitis management plan introduced by the CELLIT project?                                                                                                                                                                                                                                       |

---

**Table S4.** Semi-structured interview questions
