# Supplementary material for: Implementation of a Cellulitis Management Plan in Three Australian Regional Health Services to Address an Evidence–Practice Gap in Antibiotic Prescribing
Source: MDPI journal article supplement (doi:10.3390/antibiotics10111288), 2021-10-22
Supplement: s1 [file s1]

| DAY 1                                                                    |                          |          | Post implementation |           |              |
|--------------------------------------------------------------------------|--------------------------|----------|---------------------|-----------|--------------|
|                                                                          |                          | Baseline | All                 | With plan | Without plan |
| Reason for the prescription being assessed as inappropriate <sup>#</sup> | Allergy mismatch         | 3        | 0                   | 0         | 0            |
|                                                                          | Incorrect antibiotic     | 4        | 5                   | 1         | 4            |
|                                                                          | Incorrect dose           | 27       | 15                  | 3         | 12           |
|                                                                          | Incorrect frequency      | 5        | 5                   | 1         | 4            |
|                                                                          | Non guideline compliant  | 1        | 4                   | 1         | 3            |
|                                                                          | Incorrect route          | 0        | 1                   | 1         | 0            |
|                                                                          | Serious drug interaction | 0        | 0                   | 0         | 0            |
| Day 3                                                                    |                          |          | Post implementation |           |              |
|                                                                          |                          | Baseline | All                 | With plan | Without plan |
| Reason for the prescription being assessed as inappropriate <sup>#</sup> | Allergy mismatch         | 1        | 0                   | 0         | 0            |
|                                                                          | Incorrect antibiotic     | 4        | 2                   | 0         | 2            |
|                                                                          | Incorrect dose           | 9        | 3                   | 0         | 3            |
|                                                                          | Incorrect frequency      | 4        | 3                   | 1         | 2            |
|                                                                          | Non guideline compliant  | 0        | 1                   | 0         | 1            |
|                                                                          | Incorrect route          | 0        | 0                   | 0         | 0            |
|                                                                          | Serious drug interaction | 0        | 0                   | 0         | 0            |
| Discharge                                                                |                          |          | Post implementation |           |              |
|                                                                          |                          | Baseline | All                 | With plan | Without plan |
| Reason for the prescription being assessed as inappropriate <sup>#</sup> | Allergy mismatch         | 0        | 0                   | 0         | 0            |
|                                                                          | Incorrect antibiotic     | 4        | 3                   | 0         | 3            |
|                                                                          | Incorrect dose           | 7        | 3                   | 0         | 3            |
|                                                                          | Incorrect frequency      | 5        | 2                   | 1         | 1            |
|                                                                          | Non guideline compliant  | 2        | 0                   | 0         | 0            |
|                                                                          | Incorrect route          | 0        | 0                   | 0         | 0            |

<sup>#</sup>Note that each patient may have been prescribed multiple antibiotics on Day 1 or Day 3 and have multiple inappropriate reasons.

## S1 Reasons why antibiotic prescriptions for cellulitis were assessed as inappropriate
