# Supplementary material for: Implementation of a Cellulitis Management Plan in Three Australian Regional Health Services to Address an Evidence–Practice Gap in Antibiotic Prescribing
Source: MDPI journal article supplement (doi:10.3390/antibiotics10111288), 2021-10-22
Supplement: s1 [file s1]

| DAY 1                                                                    |                          |    | Post implementation |     |           |              |
|--------------------------------------------------------------------------|--------------------------|----|---------------------|-----|-----------|--------------|
|                                                                          |                          |    | Baseline            | All | With plan | Without plan |
| Reason for the prescription being assessed as inappropriate <sup>#</sup> | Allergy mismatch         | 3  | 0                   | 0   | 0         |              |
|                                                                          | Incorrect antibiotic     | 4  | 5                   | 1   | 4         |              |
|                                                                          | Incorrect dose           | 27 | 15                  | 3   | 12        |              |
|                                                                          | Incorrect frequency      | 5  | 5                   | 1   | 4         |              |
|                                                                          | Non guideline compliant  | 1  | 4                   | 1   | 3         |              |
|                                                                          | Incorrect route          | 0  | 1                   | 1   | 0         |              |
|                                                                          | Serious drug interaction | 0  | 0                   | 0   | 0         |              |
| Day 3                                                                    |                          |    | Post implementation |     |           |              |
|                                                                          |                          |    | Baseline            | All | With plan | Without plan |
| Reason for the prescription being assessed as inappropriate <sup>#</sup> | Allergy mismatch         | 1  | 0                   | 0   | 0         |              |
|                                                                          | Incorrect antibiotic     | 4  | 2                   | 0   | 2         |              |
|                                                                          | Incorrect dose           | 9  | 3                   | 0   | 3         |              |
|                                                                          | Incorrect frequency      | 4  | 3                   | 1   | 2         |              |
|                                                                          | Non guideline compliant  | 0  | 1                   | 0   | 1         |              |
|                                                                          | Incorrect route          | 0  | 0                   | 0   | 0         |              |
|                                                                          | Serious drug interaction | 0  | 0                   | 0   | 0         |              |
| Discharge                                                                |                          |    | Post implementation |     |           |              |
|                                                                          |                          |    | Baseline            | All | With plan | Without plan |
| Reason for the prescription being assessed as inappropriate <sup>#</sup> | Allergy mismatch         | 0  | 0                   | 0   | 0         |              |
|                                                                          | Incorrect antibiotic     | 4  | 3                   | 0   | 3         |              |
|                                                                          | Incorrect dose           | 7  | 3                   | 0   | 3         |              |
|                                                                          | Incorrect frequency      | 5  | 2                   | 1   | 1         |              |
|                                                                          | Non guideline compliant  | 2  | 0                   | 0   | 0         |              |
|                                                                          | Incorrect route          | 0  | 0                   | 0   | 0         |              |

<sup>#</sup>Note that each patient may have been prescribed multiple antibiotics on Day 1 or Day 3 and have multiple inappropriate reasons.

## S1 Reasons why antibiotic prescriptions for cellulitis were assessed as inappropriate
