# Supplementary material for: Implementation of a Cellulitis Management Plan in Three Australian Regional Health Services to Address an Evidence–Practice Gap in Antibiotic Prescribing
Source: MDPI journal article supplement (doi:10.3390/antibiotics10111288), 2021-10-22
Supplement: s1 [file s1]

| Characteristic                  | Site A         | Site B         | Site C         |
|---------------------------------|----------------|----------------|----------------|
| Hospital type                   | Local          | Sub-regional   | Regional       |
| Remoteness classification       | Inner regional | Outer regional | Inner regional |
| Bed numbers (acute & sub-acute) | 37             | 89             | 355            |
| Medical staff structure         | GP led         | Salaried staff | Salaried staff |
| AMS pharmacist                  | Yes            | Yes            | Yes            |
| On-site ID specialist           | No             | No             | Yes            |

**Table S2** Characteristics of the three participating health services who implemented the cellulitis management plan
