# Supplementary material for: Implementation of a Cellulitis Management Plan in Three Australian Regional Health Services to Address an Evidence–Practice Gap in Antibiotic Prescribing
Source: Antibiotics (Basel). 2021 Oct 22;10(11):1288. doi: 10.3390/antibiotics10111288 (PMC8615114; doi:10.3390/antibiotics10111288)
Supplement: Supplementary file 1 [file antibiotics-10-01288-s001.zip]

Archive with 5 entries (5 files):
- Figure_S1.pdf
- Table_S1.pdf
- Table_S2.pdf
- Table_S3.pdf
- Table_S4.pdf
